# Supplementary material for: Trends in insecticide resistance in Culex pipiens pallens over 20 years in Shandong, China
Source: Parasit Vectors. 2019 Apr 11;12:167. doi: 10.1186/s13071-019-3416-9 (PMC6460514; doi:10.1186/s13071-019-3416-9)
Supplement: Supplementary file 1 — Additional file 1: Table S1. Mosquito sampling sites and times. [file 13071_2019_3416_MOESM1_ESM.xlsx]

## Sheet: Sheet1
Additional file 1: Table S1. Mosquito sampling sites and times
sampling sites	latitude	longitude	sampling times (year)
Jining	35°40′55″N	116°60′06″E	1992,1994,2001,2004,2011,2014,2018
Zaozhuang	34°89′84″N	117°24′07″E	1993,1995,2001,2004,2011,2014,2018
Jinan	36°27′36″N	116°43′71″E	1994,1995,2004,2011,2014,2018
Taian	35°99′79″N	116°26′04″E	2001,2004,2011,2014,2018
Linyi	35°27′23″N	118°02′56″E	2014
Dezhou	37°44′31″N	116°36′44″E	2014
Qingdao	36°12′71″N	120°40′11″E	2014
